# Supplementary material for: Distribution of Hydrogenases in Cyanobacteria: A Phylum-Wide Genomic Survey
Source: Front Genet. 2016 Dec 27;7:223. doi: 10.3389/fgene.2016.00223 (PMC5186783; doi:10.3389/fgene.2016.00223)
Supplement: Supplementary file 1 [file Table1.XLSX]

## Sheet: Supplementary Table 1
Supplementary Table 1. Cyanobacterial strains without hydrogenase and/or maturase encoding genes. The strains that harbor mutated genes are predicted to not produce a fuctional enzyme, and are therefore indicated in this Table.
Strain	Description	Habitat	Subsection
Calothrix sp. PCC 6303	No Hox, Hup present, but in HupS, Cys12 and N15 are substituted	Freshwater (USA)	IV
Calothrix sp. PCC 7103	No Hox, Hup prenset, but in HupS, Cys12 and N15 are substituted	unknown	IV
Chamaesiphon minutus PCC 6605	No hydrogenases, No maturases	Freshwater (USA)	I
Chroococcidiopsis thermalis PCC 7203	HypB absent	Terrestrial (Germany)	II
Chroococcidiopsis sp. PCC 6712	No hydrogenases, No maturases	Freshwater (USA)	II
Crinalium epipsammum PCC 9333	No hydrogenases, No maturases	Terrestrial (Netherlands)	III
Cyanobacterium stanieri PCC 7202	No hydrogenases, No maturases	Freshwater	I
Cyanobacterium sp. UCYN-A2	Hup present, but the Cys224, Cys231, Cys240, Cys258, Cys261 of HupS are missing	Symbiont (USA)	IV
Cyanobium sp. PCC 7001	HoxU lacks the N-terminal domain , HypA is absent	Coastal (USA)	I
Dactylococcopsis salina PCC 8305	No hydrogenases, No maturases	Salt lake (Israel)	I
Gloeobacter violaceus PCC 7421	No hydrogenases, No maturases	Fresh water, Terrestrial (Switzerland)	I
Gloeocapsa sp. PCC 7428	No hydrogenases, No maturases	Hot spring (Sri Lanka)	I
Gloeocapsa sp. PCC 73106	No hydrogenases, No maturases	Freshwater (Switzerland)	I
Leptolyngbya boryana PCC 6306	Maturases: HypA, HypB are present	Freshwater (USA)	III
Leptolyngbya sp. PCC 6406	No hydrogenases, No maturases	Freshwater (USA)	III
Leptolyngbya sp. PCC 7376	No hydrogenases, No maturases	Terrestrial (USA, Bermuda)	III
Lyngbya majuscula 3L	No hydrogenases, for the maturases only HypD is present	Coastal (Netherland, Antilles)	III
Microcoleus vaginatus FGP-2	No hydrogenases, No maturases	Terrestrial (desert) (USA)	III
Nodosilinea nodulosa PCC 7104	No hydrogenases, No maturases	Terrestrial (USA)	III
Oscillatoria Formosa PCC 6407	No hydrogenases, No maturases	Freshwater (USA)	III
Oscillatoria sp. PCC 6506	No hydrogenases, No maturases	Freshwater	III
Prochlorococcus marinus marinus CCMP1375	No hydrogenases, No maturases	Open ocean (Atlantic)	I
Prochlorococcus marinus MIT9313	No hydrogenases, No maturases	Open Ocean (Atlantic)	I
Prochlorococcus marinus pastoris CCMP 1986	No hydrogenases, No maturases	Coastal (French Mediterranean sea)	I
Prochlorococcus sp. AS9601	No hydrogenases, No maturases	Open ocean, (Arabian sea)	I
Prochlorococcus sp. MIT9202	No hydrogenases, No maturases	Open ocean, (Pacific)	I
Prochlorococcus sp. MIT9211	No hydrogenases, No maturases	Open ocean (Pacific)	I
Prochlorococcus sp. MIT9215	No hydrogenases, No maturases	Open ocean (Pacific)	I
Prochlorococcus sp. MIT9301	No hydrogenases, No maturases	Open ocean (Atlantic)	I
Prochlorococcus sp. MIT9303	No hydrogenases, No maturases	Open ocean (Atlantic)	I
Prochlorococcus sp. MIT9312	No hydrogenases, No maturases	Open ocean (Gulf Stream)	I
Prochlorococcus sp. MIT9515	No hydrogenases, No maturases	Open ocean (Pacific)	I
Prochlorococcus sp. NATL1A	No hydrogenases, No maturases	Open ocean (Atlantic)	I
Prochlorococcus sp. NATL2A	No hydrogenases, No maturases	Open ocean (Atlantic)	I
Prochloron didemni P1-Palau	No hydrogenases, No maturases	Obligate symbiont	I
Prochlorothrix hollandica PCC 9006	Hox: mutations in hoxU and hoxF, maturases: hypB absent and mutationsin hypE and hypF	Freshwater (Netherlands)	III
Pseudanabaena sp. PCC 7367	No hydrogenases, No maturases	Coastal (Mexico)	III
Pseudanabaena sp. PCC 7429	No hydrogenases, No maturases	Freshwater (Switzerland)	III
Rivularia sp. PCC 7116	in HupS, the Cys12 N15 are substituted	Coastal (USA)	IV
Stanieria cyanosphaera PCC 7437	No hydrogenases, No maturases	Freshwater (Cuba)	II
Synechococcus elongatus PCC 7942	Maturases: hypC absent	Freshwater (USA)	I
Synechococcus sp. PCC 6312	No hydrogenases, No maturases	Freshwater (USA)	I
Synechococcus sp. PCC 7502	No hydrogenases, No maturases	Freshwater (Switzerland)	I
Synechococcus sp. BL107	No hydrogenases, No maturases	Coastal (mediterranea sea)	I
Synechococcus sp. CB0101	Maturases: hypB absent	Coastal (USA)	I
Synechococcus sp. CB0205	Hox: HoxH absent, maturases: HypB absent	Coastal (USA)	I
Synechococcus sp. CC9311	No hydrogenases, No maturases	Open ocean (Pacific)	I
Synechococcus sp. CC9605	No hydrogenases, No maturases	Coastal (USA)	I
Synechococcus sp. CC9902	No hydrogenases, No maturases	Coastal (USA)	I
Synechococcus sp. JA-2-3B'a(2-13)	No hydrogenases, No maturases	Hot spring (USA)	I
Synechococcus sp. JA-3-3Ab	No hydrogenases, No maturases	Hot spring (USA)	I
Synechococcus sp. RCC307	No hydrogenases, No maturases	Coastal (Mediterranean sea)	I
Synechococcus sp. RS9916	No hydrogenases, No maturases	Coastal (Red sea, Israel)	I
Synechococcus sp. RS9917	No hydrogenases, No maturases	Coastal (Red sea, Israel)	I
Synechococcus sp. WH 8109	No hydrogenases, No maturases	Open ocean (Atlantic)	I
Synechococcus sp. WH7803	No hydrogenases, No maturases	Open ocean (Atlantic)	I
Synechococcus sp. WH7805	No hydrogenases, No maturases	Open ocean (Atlantic)	I
Synechococcus sp. WH8102	No hydrogenases, No maturases	Open ocean (Atlantic)	I
Synechococcus sp.PCC 7336	Maturases: hypA and hypB are absent	Coastal (USA)	I
Synechocystis sp. PCC 7509	No hydrogenases, No maturases	Terrestrial (Switzerland)	I
Thermosynechococcus elongatus BP-1	No hydrogenases, No maturases	Hot spring (Japan)	I
Tolypothrix sp. PCC 9009	in Hup S, Cys12 N15 are deleted deleted	Terrestrial (USA )	IV

## Sheet: Supplementary Table 2
Supplementary Table 2. Co-occurrence of [FeMo] nitrogenase structural proteins, [FeMo]-cofactor biosynthesis proteins and H2ases in cyanobacteria. JGI accession numbers of NifH, NifK and NifD sequences are indicated. The genomes harboring nitrogenase only are marked in bold.
Strain	Hydrogenases	Nitrogenase structural genes			Necessary and sufficient Nif genes involved in FeMo-co synethesis	Other no essential Nif genes involved in FeMo-co synethesis	Habitat	Subsection
		NifH	NifK	NifD	NifB,NifE,NifN	NifU, NifS, NifV.
Aphanocapsa montana BDHKU210001	Hox	2629542210	2629542208	2629542209	Present	Present	Marine (India)	I
Halothece sp. PCC 7418	Hox	2503636510	2503636512	2503636511	Present	Present	Salt Lake (Israel)	I
Leptolyngbya sp. PCC 7375	Hox	2509842133	2509842135	2509842134	Present	Present	Coastal (USA)	III
Lyngbya confervoides BDU141951	Hox	2636606748	2636606746	2636606747	Present	Present	Marine (India)	III
Microcoleus chthonoplastes PCC 7420	Hox	647565360	647565356	647565357	Present	Present (NifV absent)	Coastal (USA)	III
Microcoleus sp. PCC 7113	Hox	2509433127	2509433125	2509433126	Present	Present	Terrestrial (USA)	III
Pleurocapsa sp. PCC 7327	Hox	2509575412	2509575414	2509575413	Present	Present	Hot spring (USA)	II
Pleurocapsa sp. PCC 7327	Hox	2509575872	2509575868	2509575869
Pseudanabaena sp. PCC 6802	Hox	2507085908	2507085906	2507085907	Present	Present	Freshwater (pond, USA)	III
Synechococcus sp.PCC 7335	Hox	647576434	647576432	647576433	Present	Present	Coastal (Mexico)	I
Xenococcus sp. PCC 7305	Hox	2508648322	2508648324	2508648323	Present	Present	Marine aquarium	II
Cyanothece sp. PCC 7425	Hox/3b	643585358	643585360	643585359	Present	Present	Freshwater (Senegal)	I
Calothrix sp. PCC 6303	Hup	2504093374/2504093218	2504093201	2504093217	Present	Present	Freshwater (USA)	IV
Calothrix sp. PCC 7103	Hup	2507478646	2507477268	2507477304/2507477302/2507477300	Present	Present	unknown	IV
Calothrix sp. PCC 7507	Hup	2505798331	2505798362	2505798332	Present	Present	Freshwater (Switzerland)	IV
Crocosphaera watsonii WH 0003	Hup	2531846730	2531846733	2531846731	Present	Present (NifU absent)	Open ocean (Pacific)	I
Crocosphaera watsonii WH 8501	Hup	638431669	638431671	638431670	Present	Present(NifU absent)	Open ocean (Atlantic)	I
cyanobacterium PCC 7702	Hup	2512632692	2512632694	2512632693	Present	Present	Hot spring (Iceland)	V
Cyanobacterium sp. UCYN-A2*	Hup	2528848177	2528848175	2528848176	Present	Present (NifV absent)	Symbiont (USA)	I
Cyanobacterium UCYN A	Hup	646530400	646530402	646530401	Present	Present	Coastal (100 km)	I
Cylindrospermum stagnale PCC 7417	Hup	2509771448	2509771473	2509771449/2509771462	Present	Present	Terrestrial (Sweden)	IV
Fischerella sp. PCC 9339	Hup	2517063015	2517063028	2517063016/2517063029	Present	Present	Freshwater	V
Fischerella sp. PCC 9431	Hup	2512979838	2512979828	2512979837	Present	Present	Freshwater	V
Mastigocladopsis repens PCC 10914	Hup	2517239414	2517239395	2517239413	Present	Present	Terrestrial Spain	V
Microchaete sp. PCC 7126	Hup	2509779469	2509779477	2509779470/2509779476	Present	Present	Freshwater USA	IV
Nostoc punctiforme PCC 73102	Hup	642599733	642599708	WP_041565131.1	Present	Present	Symbiont with cycad. (Australia)	IV
Rivularia sp. PCC 7116	Hup	2510091501	2510091425	2510091457/2510091450	Present	Present	Coastal (USA)	IV
Tolypothrix sp. PCC 9009	Hup	2507336069	2507336093	2507336070	Present	Present	Terrestrial (USA )	IV
Trichodesmium erythraeum IMS101	Hup	638109037	638109039	638109038	Present	Present	Coastal (USA)	III
Mastigocoleus testarum BC008	Hup/3b	JGI1201J43222_1006832	JGI1201J43222_1006922	JGI1201J43222_1006833	Present	Present	Marine benthic	V
Anabaena cylindrical PCC 7122	Hup/Hox	2504131751	2504131874	2504131760/2504131851	Present	Present	Freshwater (England)	IV
Anabaena sp. PCC 7108	Hup/Hox	2506492711/2506492701	2506492633	2506492700/2506492673	Present	Present	Coastal (USA)	IV
Anabaena variabilis ATCC 29413	Hup/Hox	646569746	646569748	646569747	Present	Present	Freshwater (USA)	IV
Anabaena variabilis ATCC 29413	Hup/Hox	646569419	646569433	646569420
Cyanothece sp. BH63E, ATCC 51472	Hup/Hox	2507500759	2507500761	2507500760	Present	Present	Coastal (USA)	I
Cyanothece sp. BH68, ATCC 51142	Hup/Hox	641675026	641675028	641675027	Present	Present	Coastal (USA)	I
Cyanothece sp. CCY 0110	Hup/Hox	640625205	640625207	640625206	Present	Present	Coastal (Tanzania)	I
Cyanothece sp. PCC 7424	Hup/Hox	643480377	643480375	643480376	Present	Present	Freshwater (Senegal)	I
Cyanothece sp. PCC 7822	Hup/Hox	648188591	648188593	648188592	Present	Present	Freshwater (India)	I
Cyanothece sp. PCC 8801	Hup/Hox	643474853	643474855	643474854	Present	Present	Freshwater (Taiwan)	I
Cyanothece sp. PCC 8802	Hup/Hox	644979800	644979802	644979801	Present	Present	Freshwater (Taiwan)	I
Cylindrospermopsis raciborskii CS-505	Hup/Hox	647107234	647107232	647107233	Present	Present	Freshwater (Australia)	IV
Fischerella sp. PCC 9605	Hup/Hox	2516149990	2516149992	2516149991	Present	Present	Terrestrial (Israel )	V
Fischerella sp. JSC-11	Hup/Hox	2505767548	2505767546	2505767547	Present	Present	unknown	V
Lyngbya sp. PCC 8106	Hup/Hox	640016144	640016142	640016143	Present	Present	Coastal (Germany)	III
Nodularia spumigena CCY9414	Hup/Hox	2563163078/2563163082	2563163086	2563163083	Present	Present	Coastal (Denmark)	IV
Nostoc azollae 0708	Hup/Hox	648049582	648049580	648049581	Present	Present	Symbiont with water fern	IV
Nostoc sp. PCC 7107	Hup/Hox	2503742046	2503742056	2503742047	Present	Present	Freshwater (USA)	IV
Nostoc sp. PCC 7524	Hup/Hox	2509808799	2509808779/2509808771	2509808798	Present	Present	Hot spring (Sri Lanka)	IV
Nostoc sp. PCC 7120	Hup/Hox	637231821	637231807	637231808	Present	Present	Freshwater (USA)	IV
Oscillatoria sp PCC 10802	Hup/Hox	2509509609	2509509607	2509509608	Present	Present	Freshwater (Thailand)	III
Chroococcidiopsis thermalis PCC 7203	incomplete	2503614865	2503614863	2503614864	Present	Present	Terrestrial (Germany)	II
Leptolyngbya boryana PCC 6306	incomplete	2509804224	2509804226	2509804225	Present	Present	Freshwater (USA)	III
Chroococcidiopsis sp. PCC 6712	none	2505785337	2505785335	2505785336	Present	Present	Freshwater (USA)	II
Nodosilinea nodulosa PCC 7104	none	2509775993	2509775991	2509775992	Present	Present	Terrestrial (USA)	III
Oscillatoria Formosa PCC 6407	none	2508874995	2508874997	2508874996	Present	Present (NifV absent)	Freshwater (USA)	III
Oscillatoria sp. PCC 6506	none	648859229	648859231	648859230	Present	Present (NifV absent)	Freshwater	III
Synechococcus sp. JA-2-3B'a(2-13)	none	637874833	637874835	637874834	Present	Present	Hot spring (USA)	I
Synechococcus sp. JA-3-3Ab	none	637873367	637873365	637873366	Present	Present	Hot spring (USA)	I
Leptolyngbya sp. PCC 6406	none	2517693975	2517693977	2517693976	Present	Present	Freshwater (USA)	III

## Sheet: Supplementary Table 3
Supplementary Table 3. Genomes used in this study. For each genome, the status of the sequencing is indicated in the "Status" column. F: finished, P: permanent draft, D: draft
Status	Genome Name	IMG Genome ID	Genome Size	Gene Count	Sequencing Center
F	Acaryochloris marina MBIC11017	641228474	8361599	8488	Washington University in St. Louis
P	Acaryochloris sp CCMEE 5410	2513237397	7875477	7587	J. Craig Venter Institute (JCVI)
F	Anabaena cylindrica PCC 7122	2503982047	7063285	6258	DOE Joint Genome Institute (JGI)
P	Anabaena sp. PCC 7108	2506485002	5886741	5227	DOE Joint Genome Institute (JGI)
F	Anabaena variabilis ATCC 29413	646564504	7105752	5772	DOE Joint Genome Institute (JGI)
P	Aphanocapsa montana BDHKU210001	2627853929	11500044	9221	Indian Institute of Chemical Biology
P	Arthrospira maxima CS-328	642979357	6003314	5730	DOE Joint Genome Institute (JGI)
F	Arthrospira platensis NIES-39	650377906	6788435	6676	National Institute of Technology and Evaluation
P	Arthrospira platensis Paraca	645951858	4997563	5401	ANRT
P	Arthrospira sp. PCC 8005	648276619	6145553	5718	CEA Genoscope
F	Calothrix sp. PCC 6303	2503982036	6960392	5840	DOE Joint Genome Institute (JGI)
P	Calothrix sp. PCC 7103	2507262048	11584393	10329	DOE Joint Genome Institute (JGI)
F	Calothrix sp. PCC 7507	2505679032	7023215	6250	DOE Joint Genome Institute (JGI)
F	Cyanobacterium sp. UCYN-A2	646311970	1443806	1241	Cyanobacterium sp. UCYN-A
F	Chamaesiphon minutus PCC 6605	2510436000	6761765	6427	DOE Joint Genome Institute (JGI)
D	Chroococcidiopsis sp. PCC 6712	2505679029	5720887	5176	DOE Joint Genome Institute (JGI)
F	Chroococcidiopsis thermalis PCC 7203	2503538021	6689401	6033	DOE Joint Genome Institute (JGI)
F	Crinalium epipsammum PCC 9333	2504643013	5620407	5059	DOE Joint Genome Institute (JGI)
P	Crocosphaera watsonii WH 0003	2531839001	5890504	6187	University of California, Santa Cruz
P	Crocosphaera watsonii WH 8501	638341074	6238156	6001	DOE Joint Genome Institute (JGI)
F	Cyanobacterium aponinum PCC 10605	2503707009	4176973	3614	DOE Joint Genome Institute (JGI)
P	Cyanobacterium PCC 7702	2512564012	4885827	4349	DOE Joint Genome Institute (JGI)
P	Cyanobacterium sp. UCYN-A2	2528768021	1485499	1295	Massachusetts Institute of Technology
F	Cyanobacterium stanieri PCC 7202	2503283023	3163381	2941	DOE Joint Genome Institute (JGI)
F	Cyanobium gracile PCC 6307	2508501011	3342364	3439	DOE Joint Genome Institute (JGI)
P	Cyanobium sp. PCC 7001	647533126	2834252	2826	J. Craig Venter Institute (JCVI)
P	Cyanothece sp. BH63E, ATCC 51472	2507262054	5460476	5170	DOE Joint Genome Institute (JGI)
F	Cyanothece sp. BH68, ATCC 51142	641522622	5460377	5354	Washington University in St. Louis
P	Cyanothece sp. CCY 0110	2623620300	5880532	5777	J. Craig Venter Institute (JCVI)
F	Cyanothece sp. PCC 7424	643348533	6554169	5933	DOE Joint Genome Institute (JGI)
F	Cyanothece sp. PCC 7425	643348534	5786110	5481	DOE Joint Genome Institute (JGI)
F	Cyanothece sp. PCC 7822	648028021	7841948	7041	DOE Joint Genome Institute (JGI)
F	Cyanothece sp. PCC 8801	643348535	4787694	4615	DOE Joint Genome Institute (JGI)
F	Cyanothece sp. PCC 8802	644736348	4803347	4697	DOE Joint Genome Institute (JGI)
P	Cylindrospermopsis raciborskii CS-505	647000233	3879030	3500	Leibniz Institute
F	Cylindrospermum stagnale PCC 7417	2509601025	7610589	6739	DOE Joint Genome Institute (JGI)
F	Dactylococcopsis salina PCC 8305	2509276056	3781008	3685	DOE Joint Genome Institute (JGI)
P	Fischerella sp. JSC-11	2505679024	5380000	4671	DOE Joint Genome Institute (JGI)
P	Fischerella sp. PCC 9339	2516653082	8008257	6807	DOE Joint Genome Institute (JGI)
P	Fischerella sp. PCC 9431	2512875027	7167426	6190	DOE Joint Genome Institute (JGI)
P	Fischerella sp. PCC 9605	2516143000	8079181	7130	DOE Joint Genome Institute (JGI)
P	Geitlerinema sp. PCC 7105	2510065011	6152351	5401	DOE Joint Genome Institute (JGI)
F	Geitlerinema sp. PCC 7407	2503538020	4681111	3913	DOE Joint Genome Institute (JGI)
P	Geminocystis herdmanii PCC 6308	2509601046	4263418	4199	DOE Joint Genome Institute (JGI)
F	Gloeobacter violaceus PCC 7421	2623620803	4659019	4574	Kazusa DNA Research Institute
P	Gloeocapsa sp. PCC 73106	2508501033	4025114	4152	DOE Joint Genome Institute (JGI)
F	Gloeocapsa sp. PCC 7428	2503754017	5882710	5304	DOE Joint Genome Institute (JGI)
F	Halothece sp. PCC 7418	2503538028	4179170	3920	DOE Joint Genome Institute (JGI)
P	Leptolyngbya boryana PCC 6306	2509601031	7262454	6911	DOE Joint Genome Institute (JGI)
P	Leptolyngbya sp. PCC 6406	2517572073	5776957	5341	DOE Joint Genome Institute (JGI)
P	Leptolyngbya sp. PCC 7375	2509601039	9422968	8448	DOE Joint Genome Institute (JGI)
F	Leptolyngbya sp. PCC 7376	2503754048	5125950	4654	DOE Joint Genome Institute (JGI)
P	Lyngbya confervoides BDU141951	2636415444	8799693	7670	Indian Institute of Chemical Biology
P	Lyngbya majuscula 3L	2506381026	8478612	7534	University of California, San Diego, Scripps Institute of Oceanography
P	Lyngbya sp. PCC 8106	639857035	7037511	6191	J. Craig Venter Institute (JCVI)
P	Mastigocladopsis repens PCC 10914	2517093042	6465655	5922	DOE Joint Genome Institute (JGI)
D	Mastigocoleus testarum BC008	NZ_LMTZ00000000			Arizona State University
P	Microchaete sp. PCC 7126	2509601027	5742264	5278	DOE Joint Genome Institute (JGI)
P	Microcoleus chthonoplastes PCC 7420	647533184	8679041	8359	Institut Pasteur, J. Craig Venter Institute (JCVI)
F	Microcoleus sp. PCC 7113	2509276031	7966510	6822	DOE Joint Genome Institute (JGI)
P	Microcoleus vaginatus FGP-2	2506210028	6698929	5651	DOE Joint Genome Institute (JGI)
F	Microcystis aeruginosa NIES-843	641522640	5842795	6360	Kazusa DNA Research Institute
D	Microcystis aeruginosa PCC 7806	2510917005	5200544	5108	Institut Pasteur
P	Nodosilinea nodulosa PCC 7104	2509601026	6891283	6470	DOE Joint Genome Institute (JGI)
P	Nodularia spumigena CCY9414	2623620322	5316258	4807	J. Craig Venter Institute (JCVI)
F	Nostoc azollae 0708	648028001	5486145	5379	DOE Joint Genome Institute (JGI)
F	Nostoc punctiforme PCC 73102	642555144	9059191	6791	DOE Joint Genome Institute (JGI)
F	Nostoc sp. PCC 7107	2503707008	6329823	5538	DOE Joint Genome Institute (JGI)
F	Nostoc sp. PCC 7120	637000199	7211789	6222	Kazusa DNA Research Institute
F	Nostoc sp. PCC 7524	2509601032	6718869	5688	DOE Joint Genome Institute (JGI)
F	Oscillatoria acuminata PCC 6304	2509276028	7804270	6101	DOE Joint Genome Institute (JGI)
P	Oscillatoria formosa PCC 6407	2508501075	6894060	5797	DOE Joint Genome Institute (JGI)
F	Oscillatoria nigro-viridis PCC 7112	2503982035	8272254	7006	DOE Joint Genome Institute (JGI)
P	Oscillatoria sp. PCC 10802	2509276047	8594406	7104	DOE Joint Genome Institute (JGI)
P	Oscillatoria sp. PCC 6506	648276706	6676705	5965	Curie Institute
P	Pleurocapsa sp. PCC 7319	2509601013	7386997	6749	DOE Joint Genome Institute (JGI)
F	Pleurocapsa sp. PCC 7327	2509276061	4986817	4667	DOE Joint Genome Institute (JGI)
F	Prochlorococcus marinus marinus CCMP1375	637000213	1751080	1933	CEA Genoscope
F	Prochlorococcus marinus MIT9313	637000211	2410873	2334	DOE Joint Genome Institute (JGI)
F	Prochlorococcus marinus pastoris CCMP 1986	637000214	1657990	2069	DOE Joint Genome Institute (JGI)
F	Prochlorococcus sp. AS9601	640069321	1669886	1988	J. Craig Venter Institute (JCVI)
P	Prochlorococcus sp. MIT9202	2623620984	1690387	2012	J. Craig Venter Institute (JCVI)
F	Prochlorococcus sp. MIT9211	2623620960	1688963	1902	J. Craig Venter Institute (JCVI)
F	Prochlorococcus sp. MIT9215	640753041	1738790	2059	DOE Joint Genome Institute (JGI)
F	Prochlorococcus sp. MIT9301	640069322	1641879	1967	J. Craig Venter Institute (JCVI)
F	Prochlorococcus sp. MIT9303	640069323	2682675	3133	J. Craig Venter Institute (JCVI)
F	Prochlorococcus sp. MIT9312	637000210	1709204	1860	DOE Joint Genome Institute (JGI)
F	Prochlorococcus sp. MIT9515	640069324	1704176	1968	J. Craig Venter Institute (JCVI)
F	Prochlorococcus sp. NATL1A	640069325	1864731	2251	J. Craig Venter Institute (JCVI)
F	Prochlorococcus sp. NATL2A	637000212	1842899	1985	DOE Joint Genome Institute (JGI)
D	Prochloron didemni P1-Palau	2510461037	6197726	5857	J. Craig Venter Institute (JCVI)
P	Prochlorothrix hollandica PCC 9006	2547132310	3377948	5534	St. Petersburg State University
P	Pseudanabaena sp. PCC 6802	2506783054	5621883	5447	DOE Joint Genome Institute (JGI)
F	Pseudanabaena sp. PCC 7367	2504643012	4885680	4015	DOE Joint Genome Institute (JGI)
P	Pseudanabaena sp. PCC 7429	2504557005	5476421	4820	DOE Joint Genome Institute (JGI)
P	Raphidiopsis brookii D9	647000303	3186511	3057	Leibniz Institute
F	Rivularia sp. PCC 7116	2510065008	8728773	6946	DOE Joint Genome Institute (JGI)
D	Spirulina major PCC 6313	2506520014	5050153	4460	DOE Joint Genome Institute (JGI)
P	Spirulina subsalsa PCC 9445	2506520011	5323600	4630	DOE Joint Genome Institute (JGI)
F	Stanieria cyanosphaera PCC 7437	2503754019	5544990	5041	DOE Joint Genome Institute (JGI)
F	Synechococcus elongatus PCC 6301	637000307	2696255	2585	Nagoya University
F	Synechococcus elongatus PCC 7942	637000308	2742269	2719	DOE Joint Genome Institute (JGI)
P	Synechococcus sp. BL107	2623620351	2283377	2572	J. Craig Venter Institute (JCVI)
P	Synechococcus sp. CB0101	649990022	2686395	3049	J. Craig Venter Institute (JCVI)
P	Synechococcus sp. CB0205	649990023	2427308	2766	J. Craig Venter Institute (JCVI)
F	Synechococcus sp. CC9311	637000309	2606748	2951	J. Craig Venter Institute (JCVI)
F	Synechococcus sp. CC9605	637000310	2510659	2761	DOE Joint Genome Institute (JGI)
F	Synechococcus sp. CC9902	637000311	2234828	2410	DOE Joint Genome Institute (JGI)
F	Synechococcus sp. JA-2-3B'a(2-13)	2623620979	3046682	2897	J. Craig Venter Institute (JCVI)
F	Synechococcus sp. JA-3-3Ab	637000313	2932766	2900	J. Craig Venter Institute (JCVI)
F	Synechococcus sp. PCC 6312	2509276030	3720499	3794	DOE Joint Genome Institute (JGI)
F	Synechococcus sp. PCC 7002	641522654	3409935	3237	Pennsylvania State University
P	Synechococcus sp. PCC 7335	647533236	5973558	5626	Institut Pasteur, J. Craig Venter Institute (JCVI)
P	Synechococcus sp. PCC 7336	2506520048	5140668	4768	DOE Joint Genome Institute (JGI)
F	Synechococcus sp. PCC 7502	2508501041	3583735	3669	DOE Joint Genome Institute (JGI)
D	Synechococcus sp. PCC 8807	2504643002	3632845	3293	Pennsylvania State University
F	Synechococcus sp. RCC307	640427148	2224914	2588	CEA Genoscope, Institut Pasteur, Roscoff Center for Oceanography
P	Synechococcus sp. RS9916	639857007	2664465	3010	J. Craig Venter Institute (JCVI)
P	Synechococcus sp. RS9917	638341213	2579542	2822	J. Craig Venter Institute (JCVI)
F	Synechococcus sp. WH 8109	2563366603	2111515	2713	J. Craig Venter Institute (JCVI)
P	Synechococcus sp. WH5701	638341214	3043834	3403	J. Craig Venter Institute (JCVI)
F	Synechococcus sp. WH7803	2623620330	2366980	2610	CEA Genoscope, Institut Pasteur, Roscoff Center for Oceanography
P	Synechococcus sp. WH7805	638341215	2620367	2937	J. Craig Venter Institute (JCVI)
F	Synechococcus sp. WH8102	637000314	2434428	2588	DOE Joint Genome Institute (JGI)
F	Synechocystis sp. PCC 6803, GT-I	2513237196	3570103	3217	University of Tokyo
P	Synechocystis sp. PCC 7509	2517572074	4908825	4922	DOE Joint Genome Institute (JGI)
F	Thermosynechococcus elongatus	2623620740	2593857	2624	Kazusa DNA Research Institute
F	Trichodesmium erythraeum IMS101	637000329	7750108	5156	DOE Joint Genome Institute (JGI)
P	Xenococcus sp. PCC 7305	2508501034	5929641	5421	DOE Joint Genome Institute (JGI)

## Sheet: Supplementary Table 4
Supplementary Table 4. Occurrence of the Hox bidirectional hydrogenases in Cyanobacteria. JGI accession numbers of amino acid sequences are indicated. The diazotrophic strains are marked in bold. Mutations or duplications in the hox genes are indicated in the column called “Note”. H# : substitutions in conserved L1 motifs of HoxH (Vignais and Billoud, 2007), F*: hoxF is duplicated , U*: hoxU dupl…
Strain	Hydrogenase				Diaphorase						Peptidase		Habitat	Subsection
	HoxY	note	HoxH	note	HoxU	note	HoxF	note	HoxE	note	HoxW	note
Acaryochloris marina MBIC11017	641256795		641256799		641256794		641256789		641256788		641256806	W#	Coastal (Republic of Palau)	I
Acaryochloris sp. CCMEE 5410	2514738518		2514738514		2514738519		2514738522		2514738523		2514738506	W#	Salt lake (Salton Sea) USA	I
Anabaena cylindrical PCC 7122	2504133930		2504133928		2504133932		2504133933		2504133934		2504133925		Freshwater (England)	IV
Anabaena sp. PCC 7108	2506493418		2506493420		2506493416		2506493415		2506493414		2506490986		Coastal (USA)	IV
Anabaena variabilis ATCC 29413	646570167		646570169		646570165		646570162		646570161		646570173		Freshwater (USA)	IV
Aphanocapsa montana BDHKU210001	2629541608		2629541610		2629541607		2629541604		2629541606		2629541666		Marine (India)	I
Arthrospira maxima CS-328	643170017		643170016		643170018		643170020		643170021		643170012		Freshwater (Chad)	III
Arthrospira platensis NIES-39	650388057		650388056		650388058		650388060		650388061		650388052		Freshwater (Chad)	III
Arthrospira platensis Paraca	646128390		646128391		646128389		646128387		646128386		646128395		Salt lake	III
Arthrospira sp. PCC 8005	648386232		648386231		648386233		648386235		648386236		648386227		Freshwater (India, Kenia, Mexico, Peru)	III
Calothrix sp. PCC 7507											2505803241	W#, W###	Freshwater (Switzerland)	IV
Cyanobacterium aponinum PCC 10605	2503747755		2503747758		2503747754		2503747752		2503747751		2503747156		Freshwater (Italy)	I
Cyanobium gracile PCC 6307	2508553793		2508553794		2508553792		2508553791		2508553789		2508553795		Freshwater (USA)	I
Cyanothece sp. BH63E, ATCC 51472	2507502466		2507502465		2507502467		2507502468		2507502469		2507499847		Coastal (USA)	I
Cyanothece sp. BH68, ATCC 51142	641676805		641676804		641676806		641676807		641676808		641678917		Coastal (USA)	I
Cyanothece sp. CCY 0110	2623985702		2623985703		2623985701		2623985700		2623985699		2623990048		Coastal (Tanzania)	I
Cyanothece sp. PCC 7424	643482386		643482383	H#	643482387		643482389		643482390		643482711		Freshwater (Senegal)	I
Cyanothece sp. PCC 7425	643587018		643587015		643587023		643587024		643587025		643588125		Freshwater (Senegal)	I
Cyanothece sp. PCC 7822	648188389		648188387	H#	648188390		648188393		648188394		648185202		Freshwater (India)	I
Cyanothece sp. PCC 8801	643473211		643473210		643473212		643473213		643473214		643473129	W#	Freshwater (Taiwan)	I
Cyanothece sp. PCC 8802	644978140		644978139		644978141		644978142		644978143		644978059	W#	Freshwater (Taiwan)	I
Cylindrospermopsis raciborskii CS-505	647105436		647105438		647105435		647105434		647105433		637231132		Freshwater (Australia)	IV
Cylindrospermum stagnale PCC 7417											2509767877	W#	Terrestrial (Sweden)	IV
Fischerella sp. JSC-11	2505767252		2505768962		2505767251		2505767250		2505767249		2505769828		Unknown	V
Fischerella sp. PCC 9431											2512981203	W#	Freshwater	V
Fischerella sp. PCC 9605	2516148198		2516148195		2516148199		2516148201		2516149166		2516148193		Terrestrial (Israel )	V
Geitlerinema sp. PCC 7105	2510100878		2510100879		2510100877		2510100875		2510100874		2510100885		Unknown	III
Geitlerinema sp. PCC 7407	2503607931		2503607930		2503607932		2503607933		2503607934		2503607929		Unknown	III
Geminocystis herdmanii PCC 6308	2509874121		2509875706		2509874120		2509874118		2509874117		2509873354		Freshwater USA	I
Halothece sp. PCC 7418	2503637773		2503637772		2503637774		2503637775		2503637776		2503635997		Salt Lake (Israel)	I
											2503636883	W#, W###
											2503636707	W#, W###
											2503637801	W#, W###
Lyngbya sp. PCC 8106	640017465		640017464		640017466		640017468		640017469		640017462		Coastal (Germany)	III
Leptolyngbya sp. PCC 7375	2509840378		2509840376	H#	2509840379		2509840384		2509840385		2509841149	W#, W###	Coastal (USA)	III
											25098400375	W#,
											2509840285	W#
Lyngbya confervoides BDU141951	2636606154		2636606156		2636606153		2636606152		2636606150		2636606212		Marine (India)	III
Microchaete sp. PCC 7126											2509780327	W#, W###	Freshwater USA	IV
Microcoleus chthonoplastes PCC 7420	647568276		647568277		647568275		647568274		647568273		647572283		Coastal (USA)	III
Microcoleus sp. PCC 7113	2509434901		2509434902	H#	2509434900		2509434899		2509434898		2509434903		Terrestrial (USA)	III
Microcystis aeruginosa NIES-843	641539818		641535403		641539821		641534088		641534087		641534276		Freshwater (Japan)	I
Microcystis aeruginosa PCC 7806	2511040826		2511039289		2511040829		2511039857		2511039858		2511040703		Freshwater (Netherlands)	I
Nodularia spumigena CCY9414	2624071183		2624071182		2624071184		2624071185		2624071186		2624071181		Coastal (Denmark)	IV
Nostoc azollae 708	648051636		648942705	H#	648051637		648942708		648051638		648051630	W#	Symbiont with water fern	IV
Nostoc sp. PCC 7107	2503741007		2503741005		2503741009		2503741010		2503741011		2503743720		Freshwater (USA)	IV
Nostoc sp. PCC 7120	637231126		637231128		637231124		637231114		637231113		637231132		Freshwater (USA)	IV
Nostoc sp. PCC 7524	2509809299		2509809302		2509809297		2509809296		2509809295		2509809518		Hot spring (Sri Lanka)	IV
Oscillatoria acuminate PCC 6304	2509425119		2509425120		2509425118		2509425117		2509425116		2509425124		Terrestrial (USA)	III
Oscillatoria nigro­viridis PCC 7112	2504087968		2504087969	H#	2504087967		2504087966		2504087965		2504087970		Terrestrial (USA)	III
Oscillatoria sp. PCC 10802	2509508358		2509508356		2509508359		2504087966		2509508361		2509508352		Freshwater (Thailand)	III
Pleurocapsa sp. PCC 7319	2509711450		2509711451		2509711449		2509711447		2509711446		2509711453	W#	Coastal (Mexico)	II
											2509708661
Pleurocapsa sp. PCC 7327	2509574567		2509574568		2509574565	U*	2509574563	F*	2509574562		2509573285		Hot spring (USA)	II
							2509572681
Pseudanabaena sp. PCC 6802	2507090316		2507090317		2507090315		2507090314		2507090313		2507090309		Freshwater (pond, USA)	III
Raphidiopsis brookii D9	647108039		647108037		647108040		647108041		647108042		647107833	W*	Freshwater (Brazil)	IV
Spirulina major PCC 6313	2506610062		2506610064		2506610060		2506610057		2506610056		2506607961		Coastal (USA)	III
Spirulina subsalsa PCC 9445	2506599484		2506599483		2506599485		2506599487		2506599488		2506599439		Freshwater (Italy)	III
Synechococcus elongatus PCC 6301	637617230		637617231		637617229		637616898		637616899		637617232		Freshwater (USA)	I
Synechococcus sp. PCC 7002	641610208		641610210		641610207		641610206		641610205		641610211		Coastal (Magueyes Island)	I
Synechococcus sp. PCC 7335	647580789		647580787		647580790		647580720		647580721		647580786		Coastal (Mexico)	I
Synechococcus sp. PCC 8807	2504650047		2504650049		2504650046		2504650045		2504650044		2504650050		Marine (unknown)	I
Synechococcus sp. WH5701	638960356		638960355		638960357		638960358		638960359		638960354	W#, W###	Coastal (USA)	I
Synechocystis sp. PCC 6803	651079262		651079259		651079263		651079265		651079266		651078843		Freshwater (USA)	I
Xenococcus sp. PCC 7305	2508648371		2508648369		2508648372		2508648401		2508648402		2508648385	W#	Marine aquarium	II
Reference
Devine, E., Holmqvist, M., Stensjö, K., and Lindblad, P. (2009). Diversity and transcription of proteases involved in the maturation of hydrogenases in Nostoc punctiforme ATCC 29133 and Nostoc sp. strain PCC 7120. BMC Microbiol. 9, 53. Available at: http://www.ncbi.nlm.nih.gov/entrez/query.fcgi?db=pubmed&cmd=Retrieve&dopt=AbstractPlus&list_uids=19284580. Vignais, P., and Billoud, B. (2007). Occur…

## Sheet: Supplementary Table 5
Supplementary Table 5. Overview of the substitutions found in the motif L1 (Ex[APV]xxxxRxCG[IL]Cxx[AS]Hx[IL][ACS] [AGS][AGNSV][KR] [ATV]xD) of the HoxH subunit. The substitutions are marked in bold.
Group	Species	Motif	Position L1	Substitution
3d	Oscillatoria nigro­viridis PCC 7112	L1	1	E-D
3d	Microcoleus sp. PCC 7113	L1	1	E-D
3d	Cyanothece sp. PCC 7822	L1	3	[APV]-S
3d	Cyanothece sp. PCC 7424	L1	3	[APV]-S
3d	Synechococcus sp. CB0101	L1	23	[KR]-A
3d	Leptolyngbya sp. PCC 7375	L1	24	[ATV]-S
3d	Nostoc azollae 0708	L1	26	D-A

## Sheet: Supplementary Table 6 
Supplementary Table 6. Occurrence of the H uptake hydrogenases in Cyanobacteria. JGI accession numbers of amino acid sequences are indicated. The diazotrophic strains are marked in bold. Mutations or arrangements in the hup genes are indicated in the column called “Note”. S*: hupS is interrupted by 2.2 kb DNA element. S# HupS: The C12 and N15 involved in the binding of proximal [4Fe-4S] are delet…
Strain	Hydrogenase				Peptidase		Habitat	Subsection
	HupS	note	HupL	note	HupW	note
Anabaena cylindrical PCC 7122	2504131434		2504131401	L*	2504131894		Freshwater (England)	IV
			2504131433
Anabaena sp. PCC 7108	2506492601		2506492602	L*	2506492614	W#	Coastal (USA)	IV
Anabaena variabilis ATCC 29413	646570103		646570102		646569450		Freshwater (USA)	IV
Calothrix sp. PCC 6303	2504093393	S#	2504093380	L*	2504093189		Freshwater (USA)	IV
Calothrix sp. PCC 7103	2507477206	S#	2507477227		2507477230		unknown	IV
Calothrix sp. PCC 7507	2505798392		2505798391		2505798379		Freshwater (Switzerland)	IV
Crocosphaera watsonii WH 0003	2531847717		2531847718		2531848627		Open ocean (Pacific)	I
Crocosphaera watsonii WH 8501	638434476		638434475		638429489		Open ocean (Atlantic)	I
Cyanobacterium PCC 7702	2512632474		2512632475		2512632207		Hot spring (Iceland)	V
Cyanobacterium UCYN A	646529869		646529870		646530095		Coastal (100 km)	I
Cyanobacterium sp. UCYN-A2	2528848479	S##	2528848455		2528848197		Symbiont (USA)	I
Cyanothece sp. BH63E, ATCC 51472	2507501250		2507501251		2507501910		Coastal (USA)	I
Cyanothece sp. BH68, ATCC 51142	641675538		641675539		641676226		Coastal (USA)	I
Cyanothece sp. CCY 0110	2623987217		2623987216		2623988048		Coastal (Tanzania)	I
Cyanothece sp. PCC 7424	643480077		643480078		643480079		Freshwater (Senegal)	I
Cyanothece sp. PCC 7822	648186621		648186622		648186623		Freshwater (India)	I
Cyanothece sp. PCC 8801	643476234		643476235		643473435		Freshwater (Taiwan)	I
Cyanothece sp. PCC 8802	644980856		644980855		644978371		Freshwater (Taiwan)	I
Cylindrospermopsis raciborskii CS-505	647107083	S###	647107084		647105364		Freshwater (Australia)	IV
Cylindrospermum stagnale PCC 7417	2509771504		2509771503	L*	2509771489		Terrestrial (Sweden)	IV
Fischerella sp. JSC-11	2505768493		2505768494		2505767530		unknown	V
Fischerella sp. PCC 9339	2517060507		2517060508		2517063050		Freshwater	V
Fischerella sp. PCC 9431	2512979366		2512979365		2512979811		Freshwater	V
Fischerella sp. PCC 9605	2516150021		2516150020		2516150009		Terrestrial (Israel )	V
Lyngbya sp. PCC 8106	640014402		640014401		640014397		Coastal (Germany)	III
Mastigocladopsis repens PCC 10914	2517239687		2517239686		2517239680		Terrestrial Spain	V
Mastigocoleus testarum BC008	WP_027846704.1		WP_027846705.1		WP_027842152.1		Marine benthic	V
Microchaete sp. PCC 7126	2509779523		2509779522		2509779519		Freshwater USA	IV
Nodularia spumigena CCY9414	2624070087		2624070096	L*	2624070097		Coastal (Denmark)	IV
Nostoc azollae 0708	648051375		648051374		648049558		Symbiont with water fern	IV
Nostoc punctiforme PCC 73102	642599686		642599687		642599692		Symbiont with cycad. (Australia)	IV
Nostoc sp. PCC 7107	2503743387		2503743389		2503742074		Freshwater (USA)	IV
Nostoc sp. PCC 7120	637231049		637231038		637231790		Freshwater (USA)	IV
Nostoc sp. PCC 7524	2509808743		2509808744		2509808755		Hot spring (Sri Lanka)	IV
Oscillatoria sp. PCC 10802	2509509635		2509509636		2509509637		Freshwater (Thailand)	III
Rivularia sp. PCC 7116	2510091345	S*, S#	2510091346		2510091350		Coastal (USA)	IV
	2510091343
Tolypothrix sp. PCC 9009	2507336130	S#	2507336129		2507336126		Terrestrial (USA )	IV
Trichodesmium erythraeum IMS101	638108354		638108353		638108352		Coastal (USA)	III

## Sheet: Supplementary Table 7 
Supplementary Table 7. Occurrence of the Hyp maturases in Cyanobacteria. JGI accession numbers of amino acid sequences are reported. F*: Hyp F is divided in two genes located in different places in the genome. B*: HypB lacks the H rich domain, B** HypB: lacks the H rich domain and the CCXXCG domain is replaced by CCXXCNCG
Strain		HypF	note	HypC	note	HypD	note	HypE	note	HypA	note	HypB	note	Subsection
Acaryochloris marina MBIC11017	Hox	641256801		641256800		641256756		641256766		641256805		641256804	B*	I
Acaryochloris sp. CCMEE 5410	Hox	2514738512		2514738513		2514739723		2514739732		2514738507		2514738508	B*	I
Anabaena cylindrica PCC 7122	Hup/Hox	2504131440		2504131441		2504131442		2504131444		2504131445		2504131446		IV
Anabaena sp.PCC 7108	Hup/Hox	2506490605		2506490606		2506490607		2506490609		2506490610		2506490611		IV
Anabaena variabilis ATCC 29413	Hup/Hox	646570109		646570110		646570111		646570113		646570114		646570115		IV
Aphanocapsa montana BDHKU210001	Hox/SH	2629543251		2629543252		2629543253		2629539027		2629539028		2629539029		I
Arthrospira maxima CS-328	Hox	643167934		643170022		643169395		643169398		643172785		643172784		III
Arthrospira platensis NIES-39	Hox	650385001		650388062		650389623		650389627		650385227		650385226		III
Arthrospira platensis Paraca	Hox	646132352	F*	646128385		646130447		646130851		646129256		646129254		III
Arthrospira sp. PCC 8005	Hox	648389448		648386237		648390622		648390619		648389623		648389622		III
Calothrix sp.PCC 6303	Hup	2504093473		2504093472		2504093471		2504093469		2504093468		2504093958		IV
Calothrix sp.PCC 7103	Hup	2507479092		2507479093		2507479094		2507479275		2507479266		2507479265		IV
Calothrix sp.PCC 7507	Hup	2505798398		2505798399		2505798400		2505798403		2505798404		2505798405		IV
Crocosphaera watsonii WH 0003	Hup	2531850536		2531847080		2531846342		2531845332		2531849241		2531849242		I
Crocosphaera watsonii WH 8501	Hup	638433129		638432364		638430846		638434650		638430772		638430773		I
Cyanobacterium aponinum PCC 10605	Hox	2503747584		2503747749		2503745895		2503745050		2503747586		2503747585		I
Cyanobacterium PCC 7702	Hup	2512632470		2512632469		2512632468		2512632467		2512632466		2512632465		V
Cyanobacterium sp. UCYN-A2	Hup	2528848417		2528848256		2528847863		2528847761		2528848408		2528848407		I
Cyanobacterium UCYN-A	Hup	646530380		646530336		646529914		646530855		646530371		646530370		I
Cyanobium gracile PCC 6307	Hox	2508553799		2508553800		2508553803		2508553804		2508553796		2508553798	B**	I
Cyanothece sp. BH63E, ATCC 51472	Hup/Hox	2507500315		2507499421		2507503036		2507502845		2507503030		2507503031		I
Cyanothece sp. BH68, ATCC 51142	Hup/Hox	641674577		641678464		641677397		641677192		641677391		641677392		I
Cyanothece sp. PCC 7424	Hup/Hox	643481914		643481913		643479531		643481916		643480071		643480070		I
Cyanothece sp. PCC 8801	Hup/Hox	643476598		643475305		643473959		643476337		643473536		643473537		I
Cyanothece sp. PCC 8802	Hup/Hox	644980490		644980278		644978909		644980749		644978475		644978476		I
Cyanothece sp.CCY 0110	Hup/Hox	2623988905		2623987853		2623988675		2623985384		2623988681		2623988680		I
Cyanothece sp.PCC 7425	Hox/3b	643583477		643583478		643583480		643583481		643583482		643583483		I
Cyanothece sp.PCC 7822	Hup/Hox	648185612		648185611		648187961		648185615		648186615		648186614		I
Cylindrospermopsis raciborskii CS-505	Hup/Hox	647105621		647105604		647105603		647105602		647105601		647105600		IV
Cylindrospermum stagnale PCC 7417	Hup	2509771511		2509771512		2509771513		2509771514		2509771515		2509771516		IV
Fischerella sp.PCC 9339	Hup	2517060501		2517060500		2517060499		2517060497		2517060496		2517060495		V
Fischerella sp.PCC 9431	Hup	2512979372		2512979373		2512979374		2512979377		2512979378		2512979379		V
Fischerella sp.PCC 9605	Hup/Hox	2516150027		2516150028		2516150029		2516150031		2516150032		2516150033		V
Fischerella sp. JSC-11	Hup/Hox	2505768488		2505768487		2505768486		2505768483		2505768482		2505768481		V
Geitlerinema sp.PCC 7105	Hox	2510100843		2510100842		2510100850		2510100873		2510100849		2510100848		III
Geitlerinema sp.PCC 7407	Hox	2503607925		2503607924		2503607920		2503607919		2503607927		2503607926		III
Geminocystis herdmanii PCC 6308	Hox	2509875104		2509805840		2509875105		2509874010		2509873355		2509875103		I
Halothece sp. PCC 7418	Hox	2503635278		2503635277		2503635273		2503635271		2506359996		2503635995		I
Leptolyngbya sp. PCC 7375	Hox	2509840371		2509805841		2509840350		2509840342		2509840374		2509840373	B*	III
Lyngbya confervoides BDU141951	Hox/MbH	2636607779		2636607780		2636607781		2636603823		2636603822		2636603821		III
Lyngbya sp. PCC 8106	Hup/Hox	640014409		640014410		640014412		640014415		640014416		640014417		III
Mastigocladopsis repens PCC 10914	Hup	2517239692		2517239693		2517239694		2517239695		2517239696		2517239697		V
Mastigocoleus testarum Bc008	Hup/3b	WP_027845903.1		WP_027845904.1		WP_036267181.1		WP_027845273.1		WP_027845272.1		WP_027845271.1		V
Microchaete sp. PCC 7126	Hup	2509779529		2509779530		2509779531		2509779534		2509779535		2509779536		IV
Microcoleus chthonoplastes PCC 7420	Hox	647572278		647572276		647572275		647572273		647571604		647571605		III
Microcoleus sp. PCC 7113	Hox	2509434907		2509434908		2509434911		2509434912		2509434905		2509434906		III
Microcystis aeruginosa NIES-843	Hox	641540189		641540205		641540204		641539814		641539812		641539811		I
Microcystis aeruginosa PCC 7806	Hox	2511041301		2511042537		2511042536		2511043093		2511043091		2511043090		I
Nodularia spumigena CCY9414	Hup/Hox	2624070081		2624070080		2624070079		2624070077		2624070076		2624070075		IV
Nostoc azollae 0708	Hup/Hox	648051382		648051383		648051384		648051385		648051386		648051387		IV
Nostoc punctiforme PCC 73102	Hup	642599680		642599679		642599678		642599677		642599676		642599675		IV
Nostoc sp. PCC 7107	Hup/Hox	2503739388		2503739387		2503739386		2503739384		2503739383		2503739382		IV
Nostoc sp. PCC 7524	Hup/Hox	2509808735		2509808734		2509808733		2509808731		2509808730		2509808729		IV
Nostoc sp. PCC 7120	Hup/Hox	637231055		637231056		637231057		637231059		637231060		637231061		IV
Oscillatoria acuminate PCC 6304	Hox	2509425127		2509425128		2509424701		2509425115		2509425125		2509425126		III
Oscillatoria nigro­viridis PCC 7112	Hox	2504087973		2504087974		2504087979		2504087981		2504087971		2504087972		III
Oscillatoria sp. PCC 10802	Hup/Hox	2509508345		2509508344		2509508366		2509508363		2509508350		2509508349		III
Pleurocapsa sp. PCC 7319	Hox	2509708370		2509707675		2509707674		2509707707		2509707708		2509707709		II
Pleurocapsa sp.PCC 7327	Hox	2509575541		2509575542		2509575545		2509572473		2509575839		2509575838		II
Pseudanabaena sp. PCC 6802	Hox	2507090301		2507087513		2507087512		2507087509		2507090308		2507090307		III
Raphidiopsis brookii D9	Hox	647110732		647110729		647110728		647110727		647110726		647110725		IV
Rivularia sp. PCC 7116	Hup	2510091289		2510091288		2510091287		2510091285		2510091284		2510091283		IV
Spirulina major PCC 6313	Hox	2506610850		2506610849		2506610208		2506611161		2506607962		2506611780		III
Spirulina subsalsa PCC 9445	Hox	2506597361		2506597362		2506600896		2506599558		2506599438		2506599437		III
Synechococcus elongatus PCC 6301	Hox	637617235		637617236		637617401		637617985		637617233		637617234		I
Synechococcus sp. PCC 7002	Hox	641610214		641610215		641610216		641610204		641610212		641610213		I
Synechococcus sp. PCC 8807	Hox	2504650053		2504650054		2504650055		2504650042		2504650051		2504650052		I
Synechococcus sp. WH5701	Hox	638960350		638960349		638960346		638960345		638960353		638960351	B*	I
Synechococcus sp.PCC 7335	Hox	647580670		647580783		647580775		647580772		647580785		647576244	B**	I
Synechocystis sp.GT-S, PCC 6803	Hox	2514154537		2514153944		2514152365		2514153235		2514154124		2514154079		I
Tolypothrix sp. PCC 9009	Hup	2507336387		2507336388		2507336389		2507336391		2507336392		2507336393		IV
Trichodesmium erythraeum IMS101	Hup	638106072		638106073		638106074		638106075		638106076		638106080		III
Xenococcus sp. PCC 7305	Hox	2508648397		2508648398		2508648367		2508648366		2508648387		2508648385		II

## Sheet: Supplementary Table 8
Supplementary Table 8. Homologues of O2-tolerant hydrogenases in Cyanobacteria. The accession numbers of the sequences detected in the cyanobacterial genomes are indicated.
Group	Strains
1		Small subunit	Large subunit	Cyt-B (HoxZ)		Protease (HoxM)
	Lyngbya confervoides BDU141951	2636601239	2636601238	2636601237		2636601236
3b		α	β	δ	γ	Protease
	Mastigocoleus testarum BC008	WP_036267132.1	WP_027844921.1	WP_027844915.1	WP_027844918.1	WP_036266758.1
	Leptolyngbya boryana PCC 6306	2509805835	2509805833	2509805836	2509805837	2509805838
	Cyanothece sp. PCC 7425	643585657	643585659	643585656	643585655	643585654
3d		HoxY	HoxH	HoxU	HoxF	HoxW	HoxI
	Aphanocapsa montana BDHKU210001	2629535377	2629535376	2629535377	2629541606	2629535375	None

## Sheet: Supplementary Table 9 
Supplementary Table 9. Proteins involved in the maturation process or in the electron transport coupling for andin the MBH O2-tolerant enzymes. (Bernhard 1996) The cyanobacterium strain is indicated in bold.
Strains	Phylum	HoxZ	HoxM	HoxL	HoxO	HoxQ	HoxR	HoxT	HoxV
Alteromonas macleodii 'English Channel 615	Proteobacteria (γ)	2562488174	2562488176	2562488177	2562488178	2562488179			2562488182
Escherichia coli K12	Proteobacteria (γ)	2513211970	2513211971	2513213495	2513211972	2513211973
Hydrogenovibrio marinus DSM 11271	Proteobacteria (γ)	2574156218	2574156221	2574156222	2574156223	2574156224	2574156225	2574156226
Lyngbya confervoides BDU141951	Cyanobacteria	2636601237	2636601236
Ralstonia eutropha H16	Proteobacteria (β)	640427438	640427440	640427441	640427442	640427443	640427444	640427445	640427446
Rubrivivax gelatinosus	Proteobacteria (β)	2550606838	2550606836	2550606835	2550606834	2550606833	2550606832	2550606831	2550607327
Salmonella enterica C629	Proteobacteria (γ)	2688754353	2688754664	2688753317	2688754666	2688754667
Bernhard, M., Schwartz, E., Rietdorf, J., and Friedrich, B. (1996). The Alcaligenes eutrophus membrane-bound hydrogenase gene locus encodes functions involved in maturation and electron transport coupling. J. Bacteriol. 178, 4522–4529.

## Sheet: Supplementary Table 10
Supplementary Table 10. Accession numbers of studied genes, and the threshlod values used in the Blast analysis.
Gene	Strain	NCBI accession number	Jgi accession number	e value	Group
H_domain	Clostridium pasteurianum	AAA23248.1		e-50	Fe-Fe
hydE	Thermotoga maritima MSB8	Q9X0Z6.1		e-50	Maturases Fe-Fe
hydF	Thermotoga maritima MSB8	NP_228255.1		e-20	Maturases Fe-Fe
hydG	Thermotoga maritima MSB8	NP_229072.1		e-10	Maturases Fe-Fe
HoxZ	Ralstonia eutropha H16	P31898.1	640427438	e-5	MBH oxygen tolerant hydrogenase maturation proteins
hupL	Nostoc punctiforme PCC 73102	AAC16277.1	642599687	e-50	Ni-Fe 2a
hupS	Nostoc punctiforme PCC 73102	AAC16276.1	642599686	e-50	Ni-Fe 2a
hupW	Nostoc punctiforme PCC 73102	ACC79156.1	642599692	e-10	Ni-Fe 2a
hoxB	Alcaligenes hydrogenophilus	AAB49360		e-100	Ni-Fe 2b
hoxC	Alcaligenes hydrogenophilus	AAB49361		e-100	Ni-Fe 2b
frhA	Methanobacterium thermoautotrophicum	AAA72187		e-50	Ni-Fe 3a
frhG	Methanobacterium thermoautotrophicum	AAA72189		e-20	Ni-Fe 3a
3b α	Pyrococcus furiosus	E7FI44.1		e-30	Ni-Fe 3b
3b β	Pyrococcus furiosus	Q8U2E5.1		e-30	Ni-Fe 3b
3b γ	Pyrococcus furiosus	Q8U2E4.1		e-30	Ni-Fe 3b
3b δ	Pyrococcus furiosus	E7FHU4.1		e-50	Ni-Fe 3b
mvhA1	Methanobacterium thermoautotrophicum	AAB02351		e-50	Ni-Fe -3C
mvhG1	Methanobacterium thermoautotrophicum	AAB02350		e-50	Ni-Fe -3C
hoxE	Anabaena variabilis ATCC 29413	WP_011321316.1	646570161	e-50	Ni-Fe 3d
hoxF	Anabaena variabilis ATCC 29413	CAA55873.1	646570162	e-50	Ni-Fe 3d
hoxF	RalstoNia eutropha	WP_011154011.1	2623718928	e-50	Ni-Fe 3d
hoxH	Anabaena variabilis ATCC 29413	CAA55878.1	646570169	e-50	Ni-Fe 3d
hoxH	Ralstonia eutropha H16	WP_011154013.1	2623718931	e-50	Ni-Fe 3d
hoxI	Ralstonia eutropha H16	WP_011154015.1	2623718933	e-50	Ni-Fe 3d
hoxU	Anabaena variabilis ATCC 29413	CAA55874.1	646570165	e-50	Ni-Fe 3d
hoxU	Ralstonia eutropha H16	WP_011154010.1	2623718929	e-50	Ni-Fe 3d
hoxW	Anabaena variabilis ATCC 29413	ABA24262.1	646570173	e-10	Ni-Fe 3d
hoxW	Ralstonia eutropha H16	WP_011154014.1	2623718932	e-50	Ni-Fe 3d
hoxY	Anabaena variabilis ATCC 29413	CAA55876.1	646570167	e-50	Ni-Fe 3d
hoxY	RalstoNia eutropha	P22319.1	2623718930	e-50	Ni-Fe 3d
cooH	Methanococcus jannaschii	AAB98504		e-50	Ni-Fe 4
cooL	Methanococcus jannaschii	AAB98505		e-50	Ni-Fe 4
Hyce	Escherichia coli	CAA35550.1		e-50	Ni-Fe 4
pHG064	Ralstonia eutropha H16	WP_011153986.1	640427496	e-50	Ni-Fe 5
pHG065	Ralstonia eutropha H16	WP_011153987.1	640427497	e-50	Ni-Fe 5
hypA	Nostoc punctiforme PCC 73102	ACC79140.1	642599676	e-5	Ni-Fe hydrogenase maturation proteins
hypB	Nostoc punctiforme PCC 73102	ACC79139.1	642599675	e-30	Ni-Fe hydrogenase maturation proteins
hypC	Nostoc punctiforme PCC 73102	WP_012407170.1	642599679	e-5	Ni-Fe hydrogenase maturation proteins
hypD	Nostoc punctiforme PCC 73102	ACC79142.1	642599678	e-50	Ni-Fe hydrogenase maturation proteins
hypE	Nostoc punctiforme PCC 73102	ACC79141.1	642599677	e-20	Ni-Fe hydrogenase maturation proteins
hypF	Nostoc punctiforme PCC 73102	WP_012407170.1	642599680	e-50	Ni-Fe hydrogenase maturation proteins
hyaA	Escherichia coli	WP_001058323.1	2513211968	e-50	Ni-Fe mbh 1
hyaB	Escherichia coli	WP_039000790.1	2513211969	e-50	Ni-Fe mbh 1
hyaC	Escherichia coli	WP_001186424.1	2513211970	e-50	Ni-Fe mbh 1
HoxM	Ralstonia eutropha H16	P31909.2	640427440	e-5	Ni-Fe MBH oxygen tolerant hydrogenase maturation proteins
HoxL	Ralstonia eutropha H16	WP_011153931.1	640427441	e-5	Ni-Fe MBH oxygen tolerant hydrogenase maturation proteins
HoxO	Ralstonia eutropha H16	WP_011153932.1	640427442	e-5	Ni-Fe MBH oxygen tolerant hydrogenase maturation proteins
HoxQ	Ralstonia eutropha H16	WP_011153933.1	640427443	e-5	Ni-Fe MBH oxygen tolerant hydrogenase maturation proteins
HoxR	Ralstonia eutropha H16	WP_011153934.1	640427444	e-5	Ni-Fe MBH oxygen tolerant hydrogenase maturation proteins
HoxT	Ralstonia eutropha H16	P31913.2	640427445	e-5	Ni-Fe MBH oxygen tolerant hydrogenase maturation proteins
HoxV	Ralstonia eutropha H16	WP_011153936.1	640427446	e-5	Ni-Fe MBH oxygen tolerant hydrogenase maturation proteins
NifH	Klebsiella pneumoniae	WP_004203553.1	643364581	e-50	Nitrogenase
NifD	Klebsiella pneumoniae	WP_012541112.1	643364580	e-80	Nitrogenase
NifK	Klebsiella pneumoniae	WP_008804133.1	643364579	e-80	Nitrogenase maturation proteins
NifE	Klebsiella pneumoniae	WP_012541110.1	643364576	e-80	Nitrogenase maturation proteins
NifN	Klebsiella pneumoniae	WP_012541109.1	643364575	e-80	Nitrogenase maturation proteins
NifU	Klebsiella pneumoniae	WP_008804128.1	643364573	e-80	Nitrogenase maturation proteins
NifS	Klebsiella pneumoniae	WP_012541108.1	643364572	e-80	Nitrogenase maturation proteins
NifV	Klebsiella pneumoniae	WP_023322951.1	643364571	e-50	Nitrogenase maturation proteins
NifB	Klebsiella pneumoniae	WP_012541104.1	643364564	e-20	Nitrogenase maturation proteins
